# Supplementary material for: Phosphatidyl-assisted fabrication of graphene oxide nanosheets with multiple active sites for uranium(vi) capture
Source: Royal Society of Chemistry journal article supplement (doi:10.1039/c8en00401c), 2018-01-01
Supplement: c8en00401c1.pdf [file c8en00401c1.pdf]

Electronic Supplementary Information for

# Phosphatidyl-assisted fabrication of graphene oxide nanosheets with multi-active sites for uranium(VI) capture

Peipei Yang<sup>a,d</sup>, Qi Liu<sup>a,d\*</sup>, Hongsen Zhang<sup>a,e</sup>, Jingyuan Liu<sup>a,d</sup>, Rongrong Chen<sup>a,d</sup>, Rumin Li<sup>a,c,d</sup>,

Di Wu<sup>b</sup>, Xuefeng Bai<sup>d</sup> and Jun Wang<sup>a,c,d\*</sup>

a. Key Laboratory of Superlight Material and Surface Technology, Ministry of Education, Harbin Engineering University, 150001, P. R. China.

b. Institute of Theoretical Chemistry, Jilin University, Changchun 130023, P. R. China.

c. Harbin Engineering University Capital Management Co. Ltd., P. R. China

d. College of Material Science and Chemical Engineering, Harbin Engineering University, 150001, P. R. China

e. Modern Analysis, Test and Research Center, Heilongjiang University of Science and Technology, Harbin 150027, P. R. China.

Corresponding author: Email: [zhqw1888@sohu.com](mailto:zhqw1888@sohu.com), [qiliu@hrbeu.edu.cn](mailto:qiliu@hrbeu.edu.cn)

## SI.1 Adsorption studies.

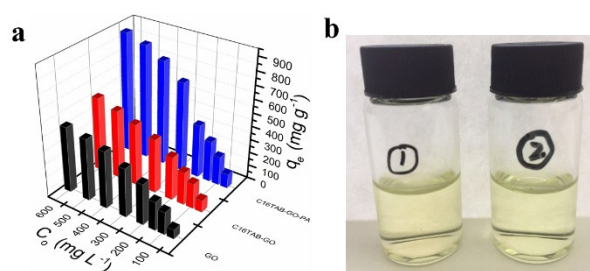

**Figure S1.** Effect of concentration of U(VI) adsorption onto GO, GO-C<sub>16</sub>TAB and GO-C<sub>16</sub>TAB-PA composites

(a) and the digital photos for pH=8 of uranium(VI) solution (b) ( $C_0=525.5$  mg L<sup>-1</sup> (1) and 623.3 mg L<sup>-1</sup> (2))

## SI.2 Kinetics study

As the sorption kinetics govern the residence time of the sorption reaction and determine the solute uptake rate or the efficiency of the reaction, the following pseudo-first-order, pseudo-second-order and Weber-Morris (W-M) models are employed to interpret the mechanism controlling the sorption process. The linear form of the two models can be expressed by the following Eqs. S1-S3:

$$\ln (q_e - q_t) = \ln q_e - k_1 t \quad (\text{S1})$$

$$t/q_t = 1/k_2 q_e^2 + t/q_e \quad (\text{S2})$$

$$q_e = K_{ip} \sqrt{t} + C \quad (\text{S3})$$

Where  $q_t$  and  $q_e$  ( $\text{mg g}^{-1}$ ) are the capacity of U(VI) at time  $t$  (min) and at equilibrium,  $K_{ip}$  is Internal diffusion constant, respectively, and  $k_1$  ( $\text{min}^{-1}$ ) and  $k_2$  ( $\text{g mg}^{-1} \text{min}^{-1}$ ) are the respective rate constants.

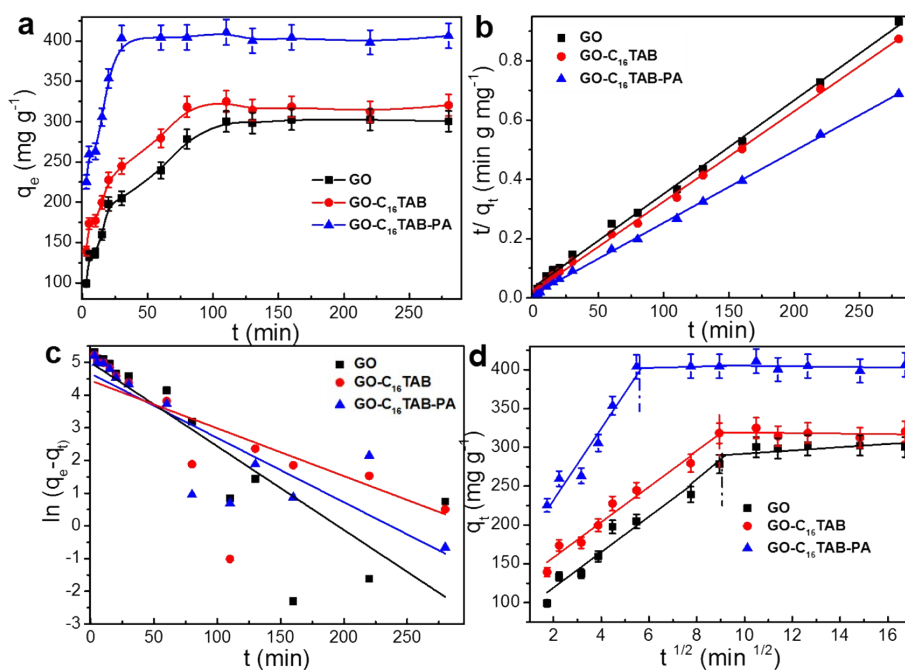

**Figure S2.** Effect of a) contact time, b) pseudo-second-order, c) pseudo-first-order, and d) Weber–Morris order plot, for the removal of U (VI) onto GO, GO-C<sub>16</sub>TAB and GO-C<sub>16</sub>TAB-PA composites, pH= 8.00; T= 25 °C; amount of adsorbent 0.01 g and C<sub>0</sub>=200 mg L<sup>-1</sup>.

**Table S1** Kinetic parameter for adsorption of U (VI)

| Kinetics model      | U(VI) initial concentration | Materials                 | K                   | $q_e^{\text{exp}}$ | $q_e^{\text{cal}}$ | $R^2$   |
|---------------------|-----------------------------|---------------------------|---------------------|--------------------|--------------------|---------|
| Pseudo-first order  | 200 mg g <sup>-1</sup>      | GO                        | 0.0256              | 279                | 85                 | 0.71044 |
|                     |                             | GO-C <sub>16</sub> TAB    | 0.0146              | 319                | 105                | 0.70211 |
|                     |                             | GO-C <sub>16</sub> TAB-PA | 0.01966             | 407                | 148                | 0.72048 |
| Pseudo-first order  | 500 mg g <sup>-1</sup>      | GO                        | 0.0167              | 476                | 294                | 0.80274 |
|                     |                             | GO-C <sub>16</sub> TAB    | 0.0121              | 540                | 138                | 0.70633 |
|                     |                             | GO-C <sub>16</sub> TAB-PA | 0.0234              | 981                | 137                | 0.92426 |
| Pseudo-second order | 200 mg g <sup>-1</sup>      | GO                        | 2.7*10 <sup>6</sup> | 279                | 317                | 0.99917 |
|                     |                             | GO-C <sub>16</sub> TAB    | 5.1*10 <sup>6</sup> | 319                | 327                | 0.99854 |
|                     |                             | GO-C <sub>16</sub> TAB-PA | 8.6*10 <sup>6</sup> | 407                | 413                | 0.99753 |
| Pseudo-second order | 500 mg g <sup>-1</sup>      | GO                        | 2.2*10 <sup>7</sup> | 476                | 495                | 0.99918 |
|                     |                             | GO-C <sub>16</sub> TAB    | 1.6*10 <sup>8</sup> | 540                | 552                | 0.99935 |
|                     |                             | GO-C <sub>16</sub> TAB-PA | 1.0*10 <sup>9</sup> | 981                | 1004               | 0.99975 |

**SI.3 Isotherms study**

In order to probe the maximum adsorption capacity and the progress of adsorption, the adsorption isotherms was studied. The adsorption of U (VI) on the GO, GO-C<sub>16</sub>TAB and GO-C<sub>16</sub>TAB-PA composites increased with increasing temperature and the Langmuir and Freundlich models were applied to simulate experimental data.

$$C_e/q_e = 1/b \cdot q_m + C_e/q_m \quad (\text{S4})$$

$$\ln q_e = \ln k + 1/n \ln C_e \quad (\text{S5})$$

$$\ln q_e = \ln q_m - \beta \varepsilon^2 \quad (\text{S6})$$

Where  $q_e$  (mg g<sup>-1</sup>) is the amount of U (VI) adsorbed at adsorbent capacity at equilibrium,  $\beta$  is activity and

$\varepsilon$  is the Polanyi potential. In this formula,  $\varepsilon$  was calculated by the following equations:

$$\varepsilon = RT \ln (1 + 1/C_e) \quad (S7)$$

$$E = 1/\sqrt{2\beta} \quad (S8)$$

Where  $C_e$  ( $\text{mg L}^{-1}$ ) is the equilibrated U (VI) concentration,  $q_e$  ( $\text{mg g}^{-1}$ ) is the amount of U (VI) adsorbed on the adsorbents capacity at equilibrium.  $K$  ( $\text{L mg}^{-1}$ ) is a Langmuir constant related to the energy of the adsorbent and  $q_m$  ( $\text{mg g}^{-1}$ ) is the saturation capacity at complete monolayer coverage.

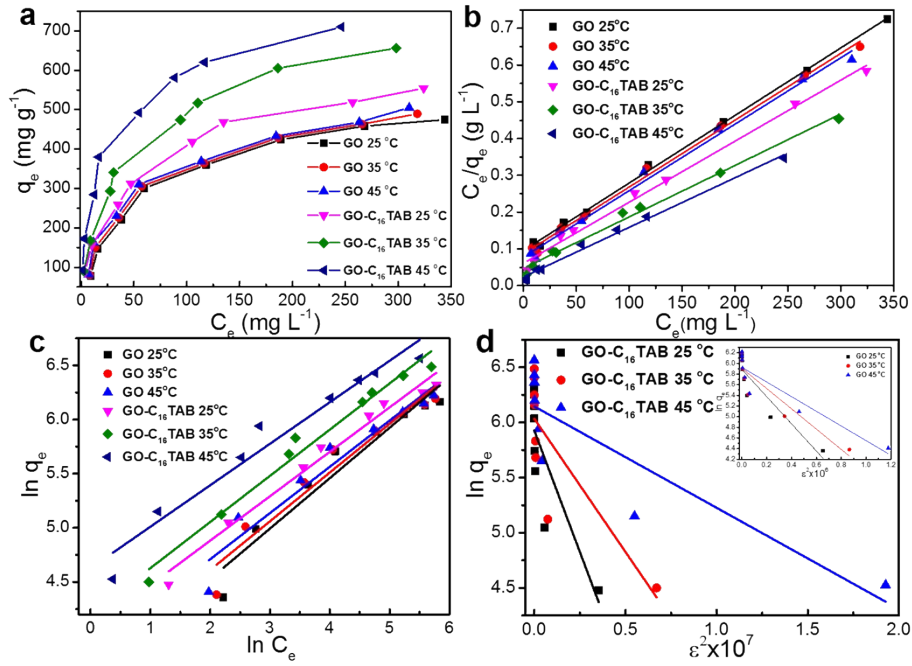

**Figure S3.** a) Isotherm model for GO-C<sub>16</sub>TAB-PA composites; b) Langmuir model; c) Freundlich model; d)

Dubinin-Radushkevich model of GO-C<sub>16</sub>TAB-PA.

**Table S2** Isotherm parameter for adsorption of U (VI)

| Materials                 | T (K) | Langmuir isotherm                      |                             |                           |         | Freundlich isotherm       |      |         |
|---------------------------|-------|----------------------------------------|-----------------------------|---------------------------|---------|---------------------------|------|---------|
|                           |       | $q^{\text{exp}}$ (mg g <sup>-1</sup> ) | $q_0$ (mg g <sup>-1</sup> ) | $b$ (L mg <sup>-1</sup> ) | $R^2$   | $K$ (L mg <sup>-1</sup> ) | $n$  | $R^2$   |
| GO                        | 298   | 474.6                                  | 534                         | 0.1823                    | 0.99887 | 36.23                     | 2.14 | 0.92893 |
|                           | 308   | 489.4                                  | 549                         | 0.2769                    | 0.99839 | 40.86                     | 2.22 | 0.93282 |
|                           | 318   | 505                                    | 552                         | 0.3635                    | 0.99271 | 47.20                     | 2.34 | 0.92684 |
| GO-C <sub>16</sub> TAB    | 298   | 554.6                                  | 602                         | 0.2034                    | 0.99858 | 57.59                     | 2.34 | 0.94869 |
|                           | 308   | 656.4                                  | 714                         | 0.2897                    | 0.99769 | 66.72                     | 2.43 | 0.96533 |
|                           | 318   | 710                                    | 741                         | 0.3142                    | 0.99391 | 102.17                    | 2.61 | 0.9769  |
| GO-C <sub>16</sub> TAB-PA | 298   | 875.4                                  | 1014                        | 0.2489                    | 0.99842 | 180.80                    | 1.71 | 0.83439 |
|                           | 308   | 930.5                                  | 1111                        | 0.3664                    | 0.99912 | 291.51                    | 2.14 | 0.87132 |
|                           | 318   | 953.1                                  | 1182                        | 0.3678                    | 0.99958 | 487.77                    | 2.64 | 0.88349 |

**Table S3.** The values of E for GO, GO-C<sub>16</sub>TAB and GO-C<sub>16</sub>TAB-PA

| Material                  | E (KJ mol <sup>-1</sup> ) |          |          |
|---------------------------|---------------------------|----------|----------|
|                           | 298.15 K                  | 308.15 K | 318.15 K |
| GO                        | 7.91                      | 8.03     | 8.81     |
| GO-C <sub>16</sub> TAB    | 8.52                      | 9.21     | 10.02    |
| GO-C <sub>16</sub> TAB-PA | 9.32                      | 10.32    | 11.68    |

In order to calculate a series of thermodynamic parameters of the adsorbent, and this subsequent chemical equation is utilized.

$$\ln K_d = \frac{\Delta S^\circ}{R} - \frac{\Delta H^\circ}{RT} \quad (\text{S9})$$

$$\Delta G^\circ = \Delta H^\circ - T\Delta S^\circ \quad (\text{S10})$$

$$K_d = \frac{q_e}{C_e} = \frac{(C_o - C_e)}{C_e} \cdot \frac{V}{m} \quad (\text{S11})$$

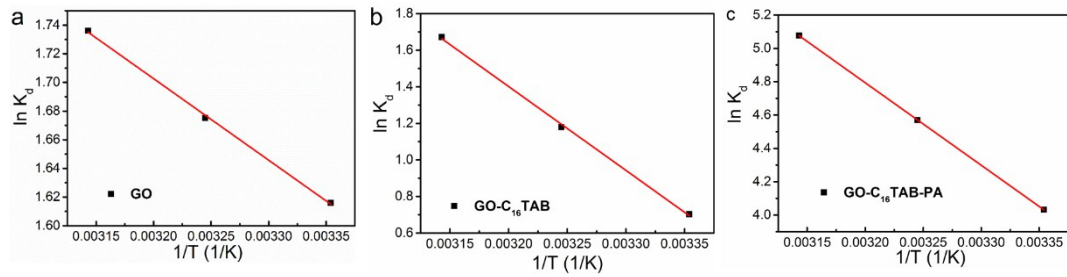

**Figure S4.** The influence of temperature on the U(VI) sorption on the GO (a), GO-C<sub>16</sub>TAB (b) and GO-C<sub>16</sub>TAB-PA (c) relationship curve between  $\ln K_d$  and  $1/T$  (1/K). pH= 8.0; T= 25 °C; amount of adsorbent 0.01 g and t= 230 min.

**Table S4** The thermodynamic parameters of GO, GO-C<sub>16</sub>TAB and GO-C<sub>16</sub>TAB-PA for U(VI) adsorption

| material                  | $\Delta H^\circ$        | $\Delta S^\circ$                       | $\Delta G^\circ$        |         |         |
|---------------------------|-------------------------|----------------------------------------|-------------------------|---------|---------|
|                           | (kJ mol <sup>-1</sup> ) | (J mol <sup>-1</sup> K <sup>-1</sup> ) | (kJ mol <sup>-1</sup> ) |         |         |
|                           |                         |                                        | 298.15K                 | 308.15K | 318.15K |
| GO                        | 21.13                   | 29.29                                  | -8.71                   | -9.04   | -9.29   |
| GO-C <sub>16</sub> TAB    | 38.16                   | 133.75                                 | -39.84                  | -41.18  | -42.51  |
| GO-C <sub>16</sub> TAB-PA | 41.15                   | 171.54                                 | -51.1                   | -52.82  | -54.53  |

#### SI.4 Effect of co-existing ions on GO, GO-C<sub>16</sub>TAB and GO-C<sub>16</sub>TAB-PA adsorbents

The selectivity coefficient ( $S_U$ ) for U(VI), is defined as a specific term to describe the potency and degree of selectivity of the adsorbents as follows:

$$S_U = \frac{K_d^U}{K_d^M} \quad (S9)$$

Where  $K_d^U$  and  $K_d^M$  are the distribution ratio of the U(VI) ion and other competing ions in sorbent and solution, respectively.

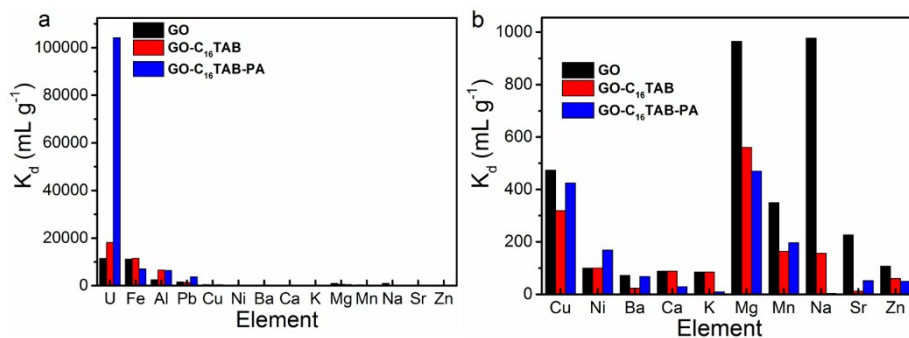

**Figure S5.** The  $K_d$  value of co-existing ions on the removal of U(VI) by GO, GO-C<sub>16</sub>TAB and GO-C<sub>16</sub>TAB-PA composites.

**Table S5** The selectivity coefficients ( $S_{U/M}$ ) of U(VI) for different metal ions in water.

|                                     | Fe    | Al    | Pb    | Cu     | Ni     | Ba      |
|-------------------------------------|-------|-------|-------|--------|--------|---------|
| GO $S_{U/M}$                        | 1.03  | 4.61  | 7.23  | 24.19  | 114.37 | 159.15  |
| GO-C <sub>16</sub> TAB $S_{U/M}$    | 1.58  | 2.77  | 13.31 | 56.86  | 181.36 | 775.21  |
| GO-C <sub>16</sub> TAB-PA $S_{U/M}$ | 14.89 | 16.34 | 27.95 | 245.07 | 617.93 | 1538.06 |

  

|                                     | Ca      | K        | Mg     | Mn     | Na      | Sr      | Zn      |
|-------------------------------------|---------|----------|--------|--------|---------|---------|---------|
| GO $S_{U/M}$                        | 130.29  | 134.87   | 11.86  | 32.79  | 11.72   | 50.51   | 107.05  |
| GO-C <sub>16</sub> TAB $S_{U/M}$    | 206.59  | 213.87   | 32.37  | 110.72 | 115.6   | 1473.22 | 302.2   |
| GO-C <sub>16</sub> TAB-PA $S_{U/M}$ | 3581.22 | 11460.74 | 221.73 | 530.69 | 27132.9 | 1994.25 | 2100.81 |

## SI.5 Adsorption-desorption experiments

### SI.5.1 U (VI) desorption experiments

The recyclability and reuse of adsorbents play an important role in the extraction of U(VI) from seawater.

The eluent agents of NaCl, citric acid, HNO<sub>3</sub>, NaHCO<sub>3</sub>, and NaOH were first investigated for desorption of U(VI). The results from Table S6 demonstrate that HNO<sub>3</sub> is the best eluent agent for reuse and recyclability of GO, GO-C<sub>16</sub>TAB and GO-C<sub>16</sub>TAB-PA adsorbents. In the typical experiment, 20 mg of sorbent with U(VI) ions was added into 50 mL eluent solution, which included in 0.1 mol L<sup>-1</sup> NaCl, 0.1 mol L<sup>-1</sup> Citric acid, 0.1 mol L<sup>-1</sup> HNO<sub>3</sub>, 0.1 mol L<sup>-1</sup> NaHCO<sub>3</sub> and 0.1 mol L<sup>-1</sup> NaOH, respectively. The flasks were stirred

for specified time (t, min) at room temperature, and then the solid phase was separated from the solution by centrifuge. The results were analysed with WGJ-III Trace Uranium Analyser to obtain the concentrations of U (VI) ions. The elution rate of U (VI) ions was calculated.

**Table S6** The elution efficiency of different eluents

| Eluent                                     | Elution efficiency (%) |                        |                           |
|--------------------------------------------|------------------------|------------------------|---------------------------|
|                                            | GO                     | GO-C <sub>16</sub> TAB | GO-C <sub>16</sub> TAB-PA |
| 0.1 mol L <sup>-1</sup> NaCl               | 38.6                   | 35.8                   | 33.5                      |
| 0.1 mol L <sup>-1</sup> Citric acid        | 52.4                   | 45.6                   | 43.6                      |
| 0.1 mol L <sup>-1</sup> HNO <sub>3</sub>   | 88.5                   | 89.3                   | 90.3                      |
| 0.1 mol L <sup>-1</sup> NaHCO <sub>3</sub> | 37.3                   | 30.9                   | 25.1                      |
| 0.1 mol L <sup>-1</sup> NaOH               | 45.2                   | 55.2                   | 60.6                      |

In regard to the above findings, we examined the effect of different concentrations of HNO<sub>3</sub> for adsorption-desorption of U(VI) onto GO, GO-C<sub>16</sub>TAB and GO-C<sub>16</sub>TAB-PA. The results were given in Table S7, indicate that the change in eluent rate responds smoothly to increasing concentration of HNO<sub>3</sub>, especially when nitrate concentrations are above 0.1 mol L<sup>-1</sup>. Taking into account these factors and cost issues, 0.1 mol L<sup>-1</sup> HNO<sub>3</sub> was used for the next step, which is the regeneration of GO, GO-C<sub>16</sub>TAB and GO-C<sub>16</sub>TAB-PA adsorbents for U(VI).

**Table S7** The elution efficiency of different concentrations of HNO<sub>3</sub>.

| Concentration<br>(mol L <sup>-1</sup> ) | Elution efficiency (%) |                        |                           |
|-----------------------------------------|------------------------|------------------------|---------------------------|
|                                         | GO                     | GO-C <sub>16</sub> TAB | GO-C <sub>16</sub> TAB-PA |
| 0.02                                    | 69.8                   | 67.3                   | 65.8                      |
| 0.04                                    | 75.3                   | 72                     | 73                        |
| 0.06                                    | 80                     | 81.4                   | 80.6                      |
| 0.08                                    | 84.8                   | 83.7                   | 85.2                      |
| 0.1                                     | 88.5                   | 89.3                   | 90.3                      |
| 0.2                                     | 90.5                   | 90.8                   | 91.3                      |
| 0.4                                     | 90.9                   | 90.5                   | 91.4                      |
| 0.6                                     | 90.8                   | 91.1                   | 91.3                      |
| 0.8                                     | 91.2                   | 91.3                   | 91.8                      |

#### SI.5.2 U (VI) absorption-desorption cycle experiments



In a typical experiment, 20 mg of sorbent was added into 50 mL of U (VI) solution and stirred for 6 h at room temperature. The solid phase was separated from the solution by centrifuge. Then, the adsorbent in the vacuum drying oven for 24 h. The dried sorbent was placed in the 50 mL eluent solution ( $0.1 \text{ mol L}^{-1} \text{ HNO}_3$ ) for the 6 h. After elution, the GO, GO- $\text{C}_{16}\text{TAB}$  and GO- $\text{C}_{16}\text{TAB}$ -PA composites was washed with abundant deionized water to remove residual  $\text{H}^+$  and  $\text{UO}_2^{2+}$  until cannot detect  $\text{UO}_2^{2+}$  in the aqueous solutions. The GO, GO- $\text{C}_{16}\text{TAB}$  and GO- $\text{C}_{16}\text{TAB}$ -PA composites were regenerated by drying at  $80^\circ\text{C}$  for 24 h and then reused. Eventually the elution efficiency of U (VI) ions was calculated. Repeat this experiment operation for six times.

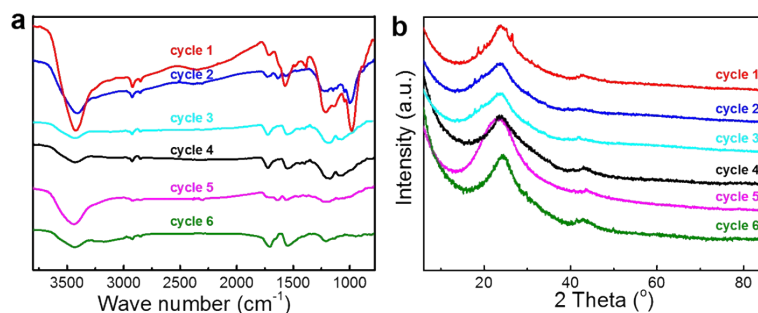

**Figure S6.** The FTIR spectra and XRD of GO- $\text{C}_{16}\text{TAB}$ -PA composites after 6 cycles.

#### SL.6 Mechanism of adsorption

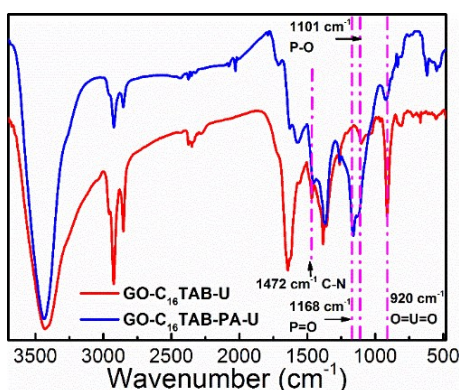

**Figure S7.** FTIR of after and before for U(VI) onto the GO- $\text{C}_{16}\text{TAB}$  and GO- $\text{C}_{16}\text{TAB}$ -PA composites.

**Table S8** Comparison of sorbent performance of GO-composites with literature data

| Adsorbents                                     | q <sub>m</sub><br>(mg g <sup>-1</sup> ) | pH | Contact time<br>(min) | Ref.          |
|------------------------------------------------|-----------------------------------------|----|-----------------------|---------------|
| Ethylenediaminetetraacetic acid-graphene oxide | 213                                     | 6  | 180                   | 1             |
| Phosphate-functionalized graphene oxide        | 252                                     | 4  | 240                   | 2             |
| Sulfonated graphene oxide                      | 310                                     | 6  | 80                    | 3             |
| Halloysite@graphene oxide                      | 161                                     | 7  | 240                   | 4             |
| Amino functionalized magnetic graphene oxide   | 141                                     | 6  | 100                   | 5             |
| Nickel ferrite /graphene oxide                 | 135                                     | 5  | 180                   | 6             |
| Graphene oxide/ polydopamine                   | 145                                     | 4  | 180                   | 7             |
| Magnetic cucurbit[6]uril/graphene oxide        | 123                                     | 5  | 150                   | 8             |
| GO-C <sub>16</sub> TAB-PA                      | 923                                     | 8  | 60                    | Present study |

1. S. Liu, H. Zhang, D. Peng, D. Yuan, L. Wu and J. Ma, Uranium uptake with graphene oxide sponge prepared by facile EDTA - assisted hydrothermal process, *Internat. J. Energ. Res.*, 2017, **41**, 263-273.
2. X. Liu, J. Li, X. Wang, C. Chen and X. Wang, High performance of phosphate-functionalized graphene oxide for the selective adsorption of U(VI) from acidic solution, *J. Nucl. Mater.*, 2015, **466**, 56-64.
3. Z. B. Zhang, Y. F. Qiu, Y. Dai, P. F. Wang, B. Gao, Z. M. Dong, X. H. Cao, Y. H. Liu and Z. G. Le, Synthesis and application of sulfonated graphene oxide for the adsorption of uranium(VI) from aqueous solutions, *J. Radioanal. Nucl. Ch.*, 2016, **310**, 1-11.
4. J. Xiao, S. Xie, Y. Jing, Y. Yao, X. Wang and Y. Jia, Preparation of halloysite@graphene oxide composite and its application for high-efficient decontamination of U(VI) from aqueous solution, *J. Mol. Liq.*, 2016, **220**, 304-310.
5. L. Chen, D. Zhao, S. Chen, X. Wang and C. Chen, One-step fabrication of amino functionalized magnetic graphene oxide composite for uranium(VI) removal, *J. Colloid Interf. Sci.*, 2016, **472**, 99-107.
6. L. P. Lingamdinne, Y. L. Choi, I. S. Kim, J. K. Yang, J. R. Koduru and Y. Y. Chang, Preparation and

characterization of porous reduced graphene oxide based inverse spinel nickel ferrite nanocomposite for adsorption removal of radionuclides, *J. Hazard. Mater.*, 2017, **326**, 145-156.

7. Z. Zhao, J. Li, T. Wen, C. Shen, X. Wang and A. Xu, Surface functionalization graphene oxide by polydopamine for high affinity of radionuclides, *Colloid. Surface. A*, 2015, **482**, 258-266.
8. L. Shao, X. Wang, Y. Ren, S. Wang, J. Zhong, M. Chu, H. Tang, L. Luo and D. Xie, Facile fabrication of magnetic cucurbit[6]uril/graphene oxide composite and application for uranium removal, *Chem. Eng. J.*, 2016, **286**, 311-319.
